# Supplementary material for: Risk Factors for Noninvasive Ventilation Failure in Children Post-Hematopoietic Cell Transplant
Source: PubMed Central journal article supplement (PMC8190382; doi:10.3389/fonc.2021.653607), 2021-05-27
Supplement: Presentation_1.pdf [file Presentation_1.pdf]

**Risk factors for noninvasive ventilation failure in children post-hematopoietic cellular  
transplant**

**Authors:**

Courtney M, Rowan, MD, MS<sup>1</sup>; Julie C Fitzgerald, MD, PhD<sup>2</sup>; Asya Agulnik, MD, MPH<sup>3</sup>;  
Matthew S. Zinter, MD<sup>4</sup>; Matthew P. Sharron, MD<sup>5</sup>; James Slaven, MS<sup>6</sup>; Erin M. Kreml, MD<sup>7</sup>;  
Rajinder PS Bajwa, MD<sup>8</sup>; Kris Mahadeo, MD<sup>9</sup>; Jerelyn Moffet, NP<sup>10</sup>; Keiko M. Tarquinio,  
MD<sup>11</sup>; Marie Steiner, MD<sup>12</sup> for the Hematopoietic Cell Transplant subgroup of the Pediatric  
Acute Lung Injury and Sepsis Investigator (PALISI) Network

**Supplemental Materials**

**Table S1: Contributing centers**

| <b>Center</b>                                                                                  | <b>City</b>      | <b>State</b> |
|------------------------------------------------------------------------------------------------|------------------|--------------|
| Riley Hospital for Children, Indiana University School of Medicine                             | Indianapolis     | IN           |
| Children's Hospital of Philadelphia, University of Pennsylvania<br>Perelman School of Medicine | Philadelphia     | PA           |
| St. Jude's Children's Research Hospital                                                        | Memphis          | TN           |
| Benioff Children's Hospital, University of California San Francisco                            | San Francisco    | CA           |
| Children's National, George Washington University School of<br>Medicine and Health Sciences    | Washington<br>DC | DC           |
| Phoenix Children's Hospital                                                                    | Phoenix          | AZ           |
| Nationwide Children's Hospital, The Ohio State University                                      | Columbus         | OH           |
| University of Texas at MD Anderson Cancer Center                                               | Houston          | TX           |
| Duke Children's Hospital, Duke University                                                      | Durham           | NC           |
| Children's Healthcare of Atlanta, Emory University                                             | Atlanta          | GA           |
| Masonic Children's Hospital, University of Minnesota                                           | Minneapolis      | MD           |

**Table S2: Sensitivity analyses for age groups to identify respiratory rate optimal cutpoint at 4 hours**

| Age groupings        | Optimal respiratory rate<br>(breaths per minute)<br>Chosen by Youden's Index |
|----------------------|------------------------------------------------------------------------------|
| <i>5 age groups</i>  |                                                                              |
| 1. Under 1 year      | 42                                                                           |
| 2. 1-3 years         | 36                                                                           |
| 3. 3-5 years         | 35                                                                           |
| 4. 5-10 years        | 35                                                                           |
| 5. Over 10 years     | 37                                                                           |
| <i>3 age groups</i>  |                                                                              |
| 1. Under 1 year      | 42                                                                           |
| 2. 1-10 years        | 35                                                                           |
| 3. Over 10 years     | 37                                                                           |
| <i>2 age groups</i>  |                                                                              |
| 1. Under 10 years    | 36                                                                           |
| 2. Over 10 years     | 37                                                                           |
| <i>Entire cohort</i> | 38                                                                           |

**Table S3: Specific diagnosis leading to transplant assessed by NIPPV failure status**

|                                             | Cohort<br>n=153 | Failed<br>n=97 | Success<br>n=56 |
|---------------------------------------------|-----------------|----------------|-----------------|
| Acute lymphoblastic leukemias (n=31)        |                 |                |                 |
| ALL                                         | 29 (19%)        | 20 (21%)       | 9 (16%)         |
| Biphenotypic leukemia                       | 2 (1%)          | 1 (1%)         | 1 (2%)          |
| Myeloid leukemias (n=38)                    |                 |                |                 |
| AML                                         | 35 (22%)        | 22 (23%)       | 13 (23%)        |
| CML                                         | 1 (0.5%)        | 0 (0%)         | 1 (2%)          |
| JMML                                        | 2 (1%)          | 1 (1%)         | 1 (2%)          |
| MDS                                         | 7 (5%)          | 6 (6%)         | 1 (2%)          |
| MPS                                         | 1 (0.5%)        | 1 (1%)         | 0 (0%)          |
| Immunodeficiencies (n=14)                   |                 |                |                 |
| SCID                                        | 4 (3%)          | 1 (1%)         | 3 (5%)          |
| Various genetic induced immunodeficiencies  | 6 (4%)          | 4 (4%)         | 2 (4%)          |
| Unspecified                                 | 6 (4%)          | 5 (5%)         | 1 (2%)          |
| Hemoglobinopathies (n=11)                   |                 |                |                 |
| Sickle cell disease                         | 9 (6%)          | 4 (4%)         | 5 (9%)          |
| Thalasemias                                 | 2 (1%)          | 0 (0%)         | 2 (4%)          |
| Bone Marrow failure (n=15)                  |                 |                |                 |
| Diamond Blackfan Anemia                     | 3 (2%)          | 2 (2%)         | 1 (2%)          |
| Aplastic Anemia                             | 4 (3%)          | 2 (2%)         | 2 (4%)          |
| Fanconi's Anemia                            | 4 (3%)          | 2 (2%)         | 2 (4%)          |
| Shwachman diamond syndrome                  | 1 (0.5%)        | 1 (1%)         | 0 (0%)          |
| Congenital amegakaryocytic thrombocytopenia | 1 (0.5%)        | 0 (0%)         | 1 (2%)          |
| Congenital neutropenia                      | 1 (0.5%)        | 1 (1%)         | 0 (0%)          |
| Unspecified                                 | 1 (0.5%)        | 1 (1%)         | 0 (0%)          |
| Metabolic (n=27)                            |                 |                |                 |
| Osteopetrosis                               | 5 (3%)          | 3 (3%)         | 2 (4%)          |
| Krabbe                                      | 2 (1%)          | 1 (1%)         | 1 (2%)          |
| Metachromatic leukodystrophy                | 1 (0.5%)        | 1 (1%)         | 0 (0%)          |
| Hurlers                                     | 4 (3%)          | 3 (3%)         | 1 (2%)          |
| Adrenoleukodystrophy                        | 4 (3%)          | 3 (3%)         | 1 (2%)          |
| Cartilage hair hypoplasia                   | 1 (0.5%)        | 1 (1%)         | 0 (0%)          |
| Harlor Syndrome                             | 1 (0.5%)        | 1 (1%)         | 0 (0%)          |
| Wiskott-Aldrich Syndrome                    | 2 (1%)          | 1 (1%)         | 1 (2%)          |
| Epidermolysis Bullosa                       | 3 (2%)          | 2 (2%)         | 1 (2%)          |
| Fucosidosis                                 | 1 (0.5%)        | 1 (1%)         | 0 (0%)          |
| Pelizaeus-Merzbacher Disease                | 1 (0.5%)        | 0 (0%)         | 1 (2%)          |
| Glycogen storage disease type 1B            | 1 (0.5%)        | 0 (0%)         | 1 (2%)          |
| HLH                                         | 1 (0.5%)        | 1 (1%)         | 0 (0%)          |
| Lymphoma (n=4)                              |                 |                |                 |
| NK cell lymphoma                            | 1 (0.5%)        | 1 (1%)         | 0 (0%)          |
| Burkitt's Lymphoma                          | 1 (0.5%)        | 1 (1%)         | 0 (0%)          |
| Mediastinal Gray Zone Lymphoma              | 1 (0.5%)        | 1 (1%)         | 0 (0%)          |
| Mycosis Fungoides/Systemic Lymphoma         | 1 (0.5%)        | 0 (0%)         | 1 (2%)          |
| Unspecified malignant disorders             | 2 (1%)          | 1 (1%)         | 1 (2%)          |
| Unspecified nonmalignant disorder           | 1 (0.5%)        | 1 (1%)         | 0 (0%)          |

Data is displayed as counts and (percentages). Percentage were rounded to the nearest whole number and therefore totals may not equal 100.

**Table S4: Vital signs and respiratory parameters comparing those who were successfully treated with NIV to those who failed NIV.**

|                                                                | <b>Initiation</b> | <b>Hour 2</b>     | <b>Hour 4</b>     | <b>Hour 8</b>     | <b>Hour 12</b>    |
|----------------------------------------------------------------|-------------------|-------------------|-------------------|-------------------|-------------------|
| <b>Heart Rate (beats per minute)</b>                           |                   |                   |                   |                   |                   |
| Success                                                        | 136 (11,157)      | 127 (113, 147)    | 126 (108, 143)    | 127 (105, 141)    | 117 (100, 130)    |
| Failure                                                        | 126 (114, 156)    | 135 (118, 150)    | 131 (111, 149)    | 124 (114, 141)    | 130 (113, 147)    |
| <i>p</i> value                                                 | 0.970             | 0.200             | 0.273             | 0.915             | 0.18              |
| <b>Mean arterial pressure (mmHg)</b>                           |                   |                   |                   |                   |                   |
| Success                                                        | 80 (72, 85)       | 75 (65, 88)       | 75 (67, 86)       | 81 (66, 86)       | 79 (68, 88)       |
| Failure                                                        | 80 (69, 94)       | 82 (69, 92)       | 84 (70, 95)       | 82 (73, 92)       | 82 (66, 98)       |
| <i>p</i> value                                                 | 0.605             | 0.258             | 0.093             | 0.143             | 0.247             |
| <b>Respiratory Rate (breaths per minute)</b>                   |                   |                   |                   |                   |                   |
| Success                                                        | 35 (26, 44)       | 31 (26, 42)       | 31 (24, 37)       | 33 (22, 37)       | 32 (24, 40)       |
| Failure                                                        | 40 (32, 52)       | 38 (26, 51)       | 39 (26, 48)       | 37 (29, 47)       | 39 (30, 48)       |
| <i>p</i> value                                                 | 0.030             | 0.045             | 0.005             | 0.003             | 0.002             |
| <b>Pulse Oximetry (%)</b>                                      |                   |                   |                   |                   |                   |
| Success                                                        | 97 (94, 100)      | 98 (96, 100)      | 99 (95, 100)      | 98 (96, 100)      | 99 (96, 100)      |
| Failure                                                        | 98 (95, 100)      | 98 (95, 100)      | 98 (96, 100)      | 98 (96, 100)      | 98 (94, 100)      |
| <i>p</i> value                                                 | 0.404             | 0.908             | 0.894             | 0.609             | 0.199             |
| <b>FiO<sub>2</sub></b>                                         |                   |                   |                   |                   |                   |
| Success                                                        | 0.50 (0.40, 0.75) | 0.43 (0.40, 0.60) | 0.40 (0.36, 0.60) | 0.40 (0.35, 0.50) | 0.40 (0.30, 0.50) |
| Failure                                                        | 0.50 (0.40, 0.66) | 0.50 (0.40, 0.60) | 0.45 (0.35, 0.55) | 0.43 (0.35, 0.60) | 0.40 (0.35, 0.60) |
| <i>p</i> value                                                 | 0.796             | 0.225             | 0.950             | 0.630             | 0.600             |
| <b>Inspiratory positive airway pressure (cmH<sub>2</sub>O)</b> |                   |                   |                   |                   |                   |
| Success                                                        | 12 (7, 14)        | 12 (8, 14)        | 12 (8, 15)        | 12 (7, 16)        | 14 (8, 16)        |
| Failure                                                        | 10 (6, 12)        | 11 (8, 14)        | 11 (8, 14)        | 12 (8, 15)        | 10 (7, 15)        |
| <i>p</i> value                                                 | 0.118             | 0.303             | 0.263             | 0.590             | 0.467             |
| <b>Expiratory positive airway pressure (cmH<sub>2</sub>O)</b>  |                   |                   |                   |                   |                   |
| Success                                                        | 6 (6, 8)          | 8 (6, 8)          | 8 (6, 8)          | 8 (6, 8)          | 8 (6, 8)          |
| Failure                                                        | 6 (6, 8)          | 6 (6, 8)          | 6 (6, 8)          | 6 (6, 8)          | 6 (6, 8)          |
| <i>p</i> value                                                 | 0.848             | 0.361             | 0.128             | 0.200             | 0.286             |

Footnote: Data presented are medians with (interquartile ranges) and were compared using a Wilcoxon rank sum test.

**Table S5: Univariate regression models for risk of NIPPV failure**

|                                                         | Unadjusted OR, (95% CI)   | <i>p</i> |
|---------------------------------------------------------|---------------------------|----------|
| Age (years)                                             | 0.97 (95% CI: 0.92, 1.03) | 0.303    |
| Days on Supplemental O <sub>2</sub> prior to NIPPV      | 1.1 (95% CI: 1.0, 1.2)    | 0.038    |
| Vasoactive use prior to or same day as NIPPV initiation | 3.7 (95% CI: 1.7, 8.1)    | 0.001    |
| FiO <sub>2</sub> at start (%)                           | 1.2 (95% CI: 0.3, 4.9)    | 0.887    |
| FiO <sub>2</sub> at 4 hours                             | 0.4 (95% CI: 0.1, 2.7)    | 0.377    |
| ≥ 10% weight gain                                       | 1.5 (95% CI: 0.7, 3.1)    | 0.301    |
| ≥ 15% weight gain                                       | 0.8 (95% CI: 0.4, 2.0)    | 0.700    |
| Renal replacement therapy prior to NIPPV failure        | 2.7 (95% CI: 0.9, 8.5)    | 0.088    |

Footnote: age is presented in years and left as a continuous variable. FiO<sub>2</sub> is presented in percentage. Age, Days on supplemental O<sub>2</sub>, and FiO<sub>2</sub> are presented as a continuous variables. Percent weight gain was calculated by [(weight (kg) at NIV initiation – weight at hospital admission)/weight at hospital admission] x 100.

**Table S6: Multivariate model for odds of NIPPV failure with respiratory rate as a continuous variable**

|                                                    | Adjusted OR (95% CI)    | <i>p</i> |
|----------------------------------------------------|-------------------------|----------|
| Age (years)                                        | 1.0 (95% CI: 0.93, 1.1) | 0.969    |
| Days on supplemental O <sub>2</sub> prior to NIPPV | 1.1 (95% CI: 0.99, 1.2) | 0.099    |
| Respiratory rate at 4 hours                        | 1.1 (95% CI: 1.02, 1.1) | 0.002    |
| Vasoactive use                                     | 4.6 (95% CI: 1.7, 12.1) | 0.002    |
| Matched related donor vs others                    | 0.3 (95% CI: 0.1, 0.9)  | 0.039    |

**Table S7: Unadjusted and multivariate model for NIPPV failure using 30 breaths per minute at 4 hours as the cutpoint.**

|                                                    | Odds Ratio (95% confidence interval) | <i>p</i> |
|----------------------------------------------------|--------------------------------------|----------|
| <b>Unadjusted Model</b>                            |                                      |          |
| Respiratory rate > 30 bpm at 4 hours               | 3.03 (1.29, 7.07)                    | 0.011    |
| <b>Multivariable model</b>                         |                                      |          |
| Respiratory rate > 30 bpm at 4 hours               | 3.03 (1.29, 7.07)                    | 0.011    |
| Vasoactive age use                                 | 4.25 (1.63, 11.06)                   | 0.003    |
| Match related donor                                | 0.33 (0.11, 1.01)                    | 0.052    |
| Days on supplemental O <sub>2</sub> prior to NIPPV | 1.07 (0.99, 1.16)                    | 0.113    |
| Age                                                | 0.99 (0.93, 1.16)                    | 0.836    |

**Table S8: Multivariate model for odds of NIPPV failure with respiratory rate as a continuous variable at 2 hours**

| Variable                               | Odds Ratio (95% confidence interval) | p     |
|----------------------------------------|--------------------------------------|-------|
| Respiratory rate at 2 hours            | 1.03 (1.002, 1.063)                  | 0.035 |
| Vasoactive agent use                   | 3.79 (1.55, 9.28)                    | 0.004 |
| Match related donor                    | 0.39 (0.14, 1.07)                    | 0.068 |
| Days on supplemental O2 prior to NIPPV | 1.07 (0.99, 1.15)                    | 0.087 |
| Age                                    | 1.01 (0.94, 1.08)                    | 0.882 |

**Table S9: Complications of NIPPV assessed by failure or successful use of NIPPV**

|                                | Failure<br>n=97 | Success<br>n=56 |
|--------------------------------|-----------------|-----------------|
| Cardiopulmonary resuscitation* | 14 (14%)        | 0 (0%)          |
| Skin breakdown                 | 5 (5%)          | 2 (4%)          |
| Epistaxis                      | 0 (0%)          | 1 (2%)          |
| Emesis without aspiration      | 2 (2%)          | 0 (0%)          |
| Aspiration                     | 0 (0%)          | 0 (0%)          |
| Sedation/Intolerance           | 5 (5%)          | 3 (5%)          |
| Excessive coughing             | 1 (1%)          | 0 (0%)          |

\*Cardiopulmonary resuscitation during or prior to intubation

## Supplemental Figure legends

### Supplemental Figure 1. Time to intubation or arrest for those that failed noninvasive positive pressure ventilation

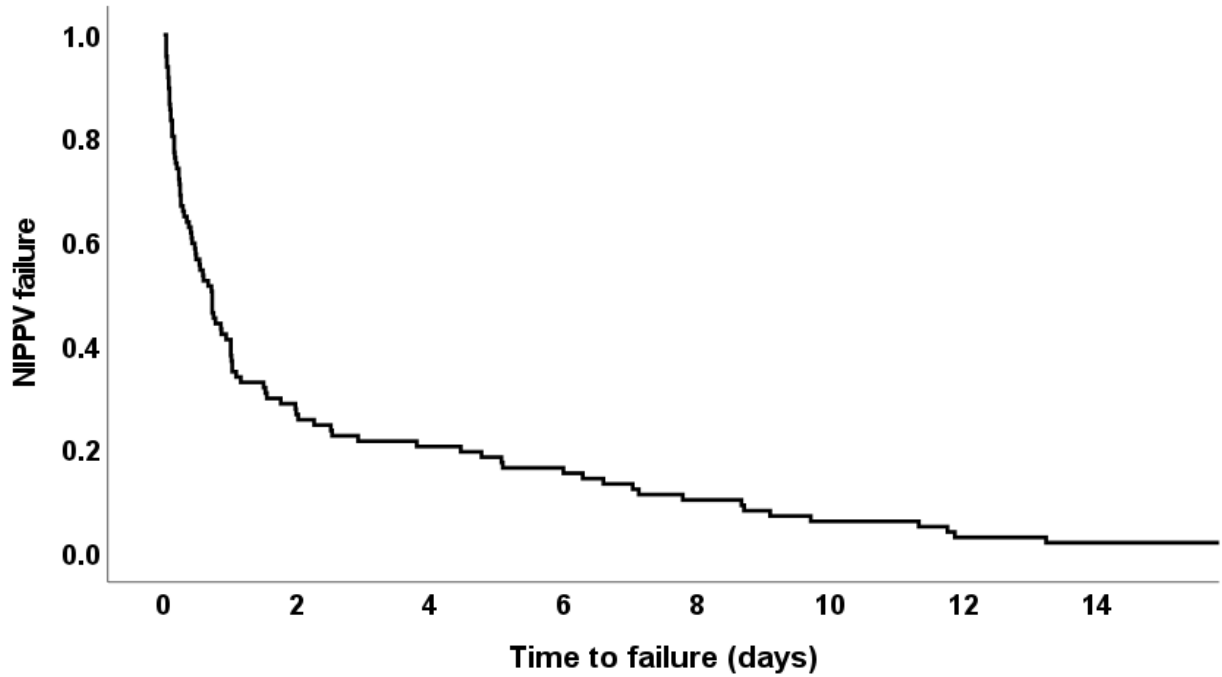

Isolating those that failed noninvasive, the present of failure of represented on the y axis with time to failure in days represented on the x axis. While there was a range of time to failure of noninvasive positive pressure ventilation, the majority of patients failed within the first two days.



**Supplemental Figure 2: Median respiratory rate trends over time stratified by NIPPV success and failure**

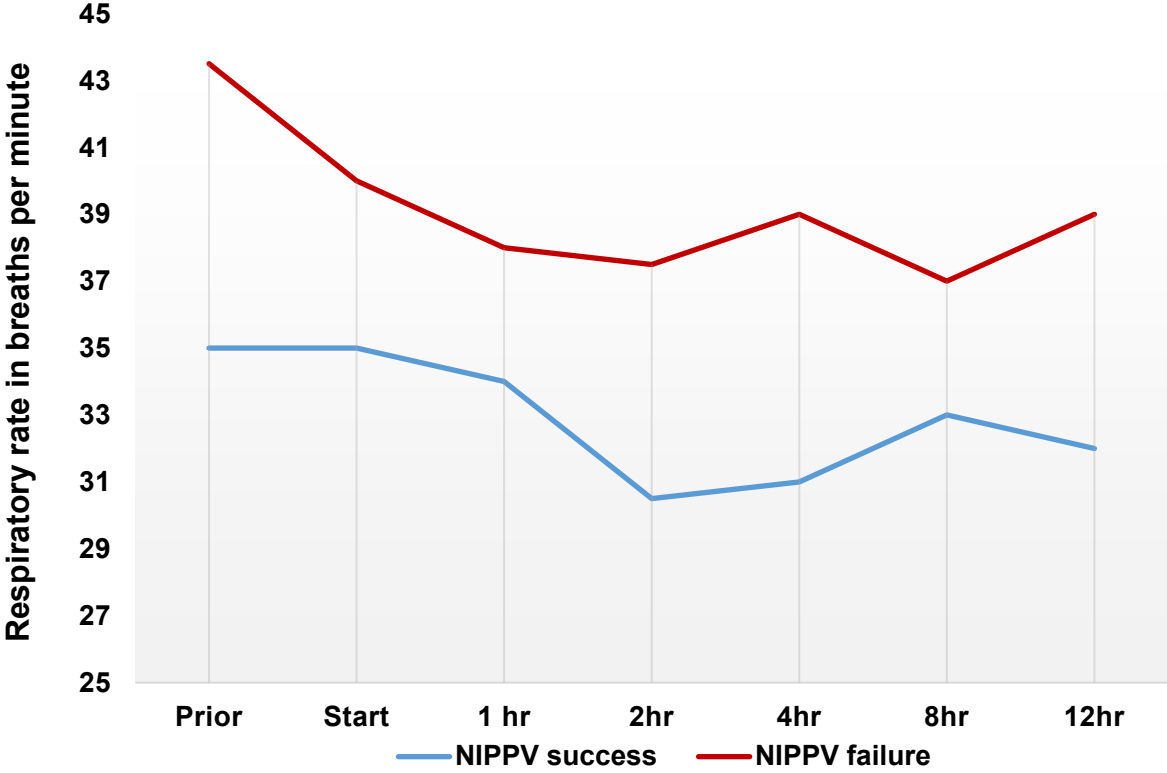

Median respiratory rate in beats per minute is trended over the first 12 hours of noninvasive positive pressure ventilation (NIPPV) use and separated by success or failure of NIPPV. Those who failed noninvasive consistently had a higher median respiratory rate at all time points.

**Supplemental Figure 3: Distribution of respiratory rate assessed by successful use of NIV at hour 4 of NIV.**

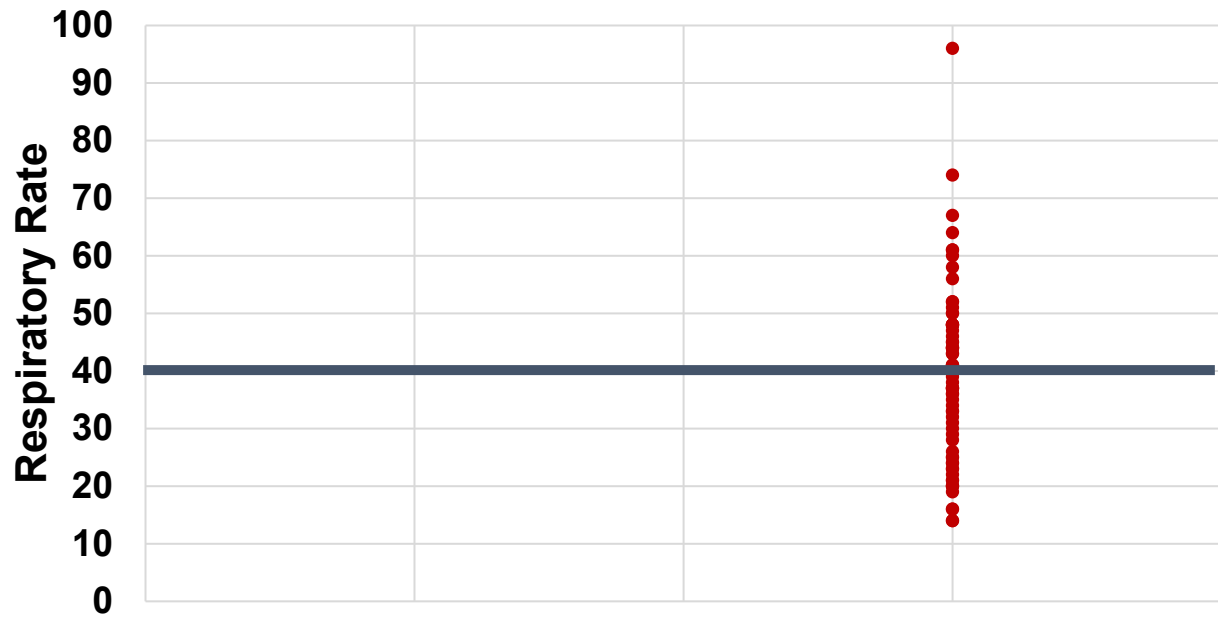

Variation in respiratory rate at hour 4 of noninvasive demonstrates that those who failed had a higher proportion of patients with a respiratory rate over 40 breaths per minute.
